# Supplementary material for: Structures of Teneurin adhesion receptors reveal an ancient fold for cell-cell interaction
Source: PubMed Central journal article supplement (PMC5851990; doi:10.1038/s41467-018-03460-0), 2018-03-14
Supplement: 41467_2018_3460_MOESM1_ESM.pdf [file 41467_2018_3460_MOESM1_ESM.pdf]

**Structures of Teneurin adhesion receptors  
reveal an ancient fold for cell-cell  
interaction**

**Supplementary Information**

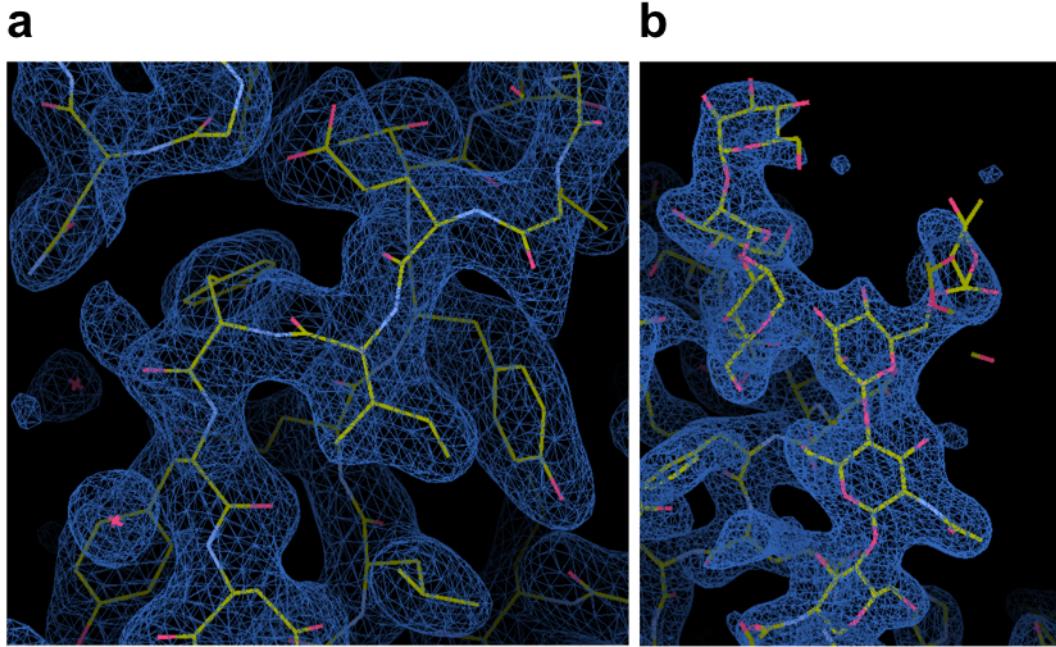

Supplementary Figure 1 | **Ten2<sup>CT</sup> electron density map.** Final electron density (2Fo-Fc, contour 1.5 $\sigma$ ) for **a**, protein and **b**, carbohydrate components of Ten2<sup>CT</sup>. Atoms are coloured yellow (carbon), blue (nitrogen) and pink (oxygen).

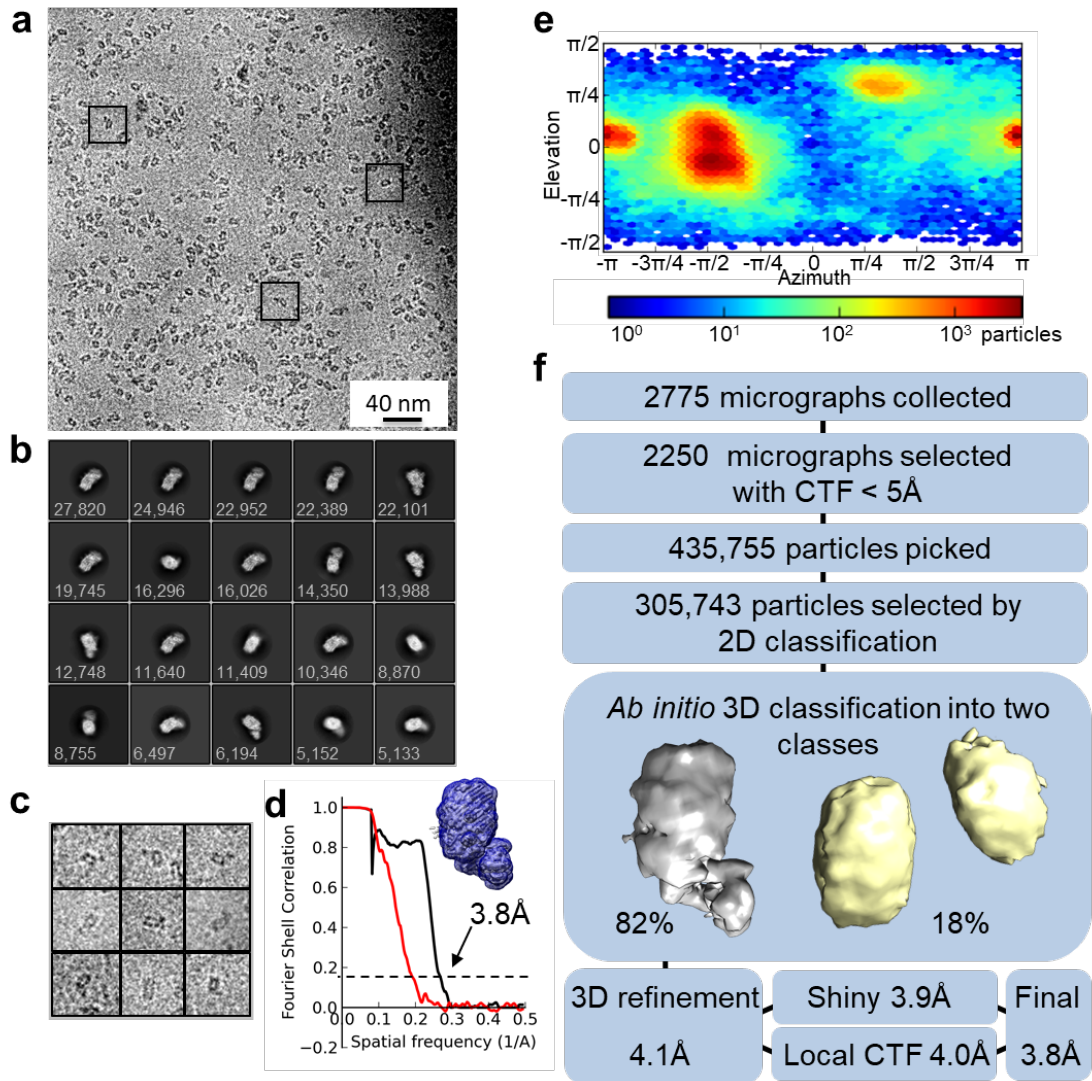

Supplementary Figure 2 | **Ten3<sup>CT</sup> cryo-EM reconstruction** **a**, Selected micrograph at a defocus level of  $-3\mu\text{m}$  showing distribution of the particles. **b**, 2D classification without alignment of final particle set into 20 classes, generated with Relion. Number in gray represents number of particles in each class. **c**, A selection of raw particles from the final particles set. **d**, Fourier Shell Correlation (FSC) curve of two-independent half-maps of the 3.8 Å reconstruction. Dashed line indicates FSC=0.143. Phase-randomized FSC in red, corrected FSC in black. Inset shows mask used to generate FSC curve. **e**, The orientation distribution of the particles in the 3.8 Å reconstruction. **f**, Overview of the workflow for the 3.8 Å reconstruction using a variety of software packages as described in more detail in the Methods section.

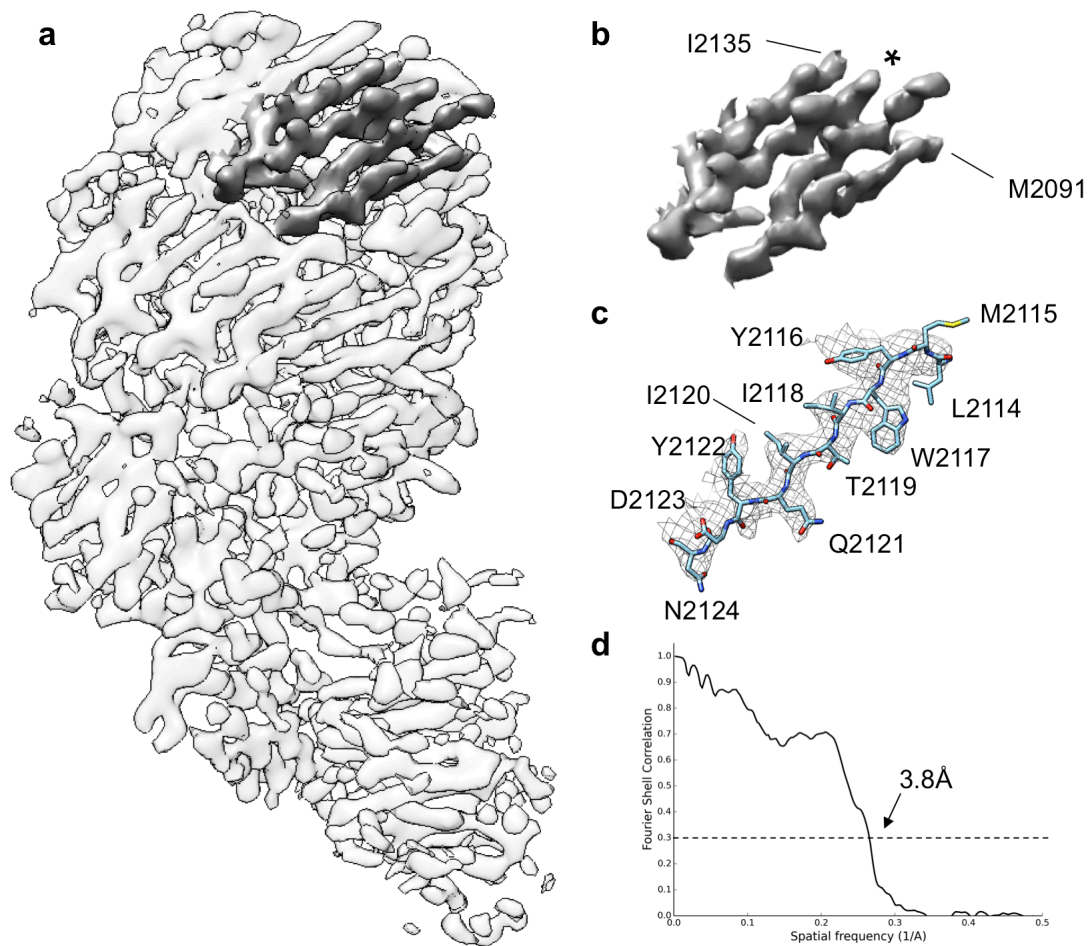

Supplementary Figure 3 | **Ten3<sup>CT</sup> cryo-EM model building.** **a**, Side view of Ten3<sup>CT</sup> map after B-factor sharpening with a B-factor of  $-100 \text{ \AA}^2$ , filtered by local resolution and HideDust setting 5. **b**  $\beta$ -strands are well separated at 3.8  $\text{\AA}$ . Shown here are residues 2091-2135. Asterisk indicates  $\beta$ -strand shown in panel **c**. **c**, Overlay of  $\beta$ -strand with Ten3<sup>CT</sup> refined model spanning residues M2115 to N2124. **d**, Fourier shell correlation curve of Ten3<sup>CT</sup> map versus Ten3<sup>CT</sup> model. Dashed line indicates FSC=0.3.

### YD Shell and FN-plugin interfacing residues

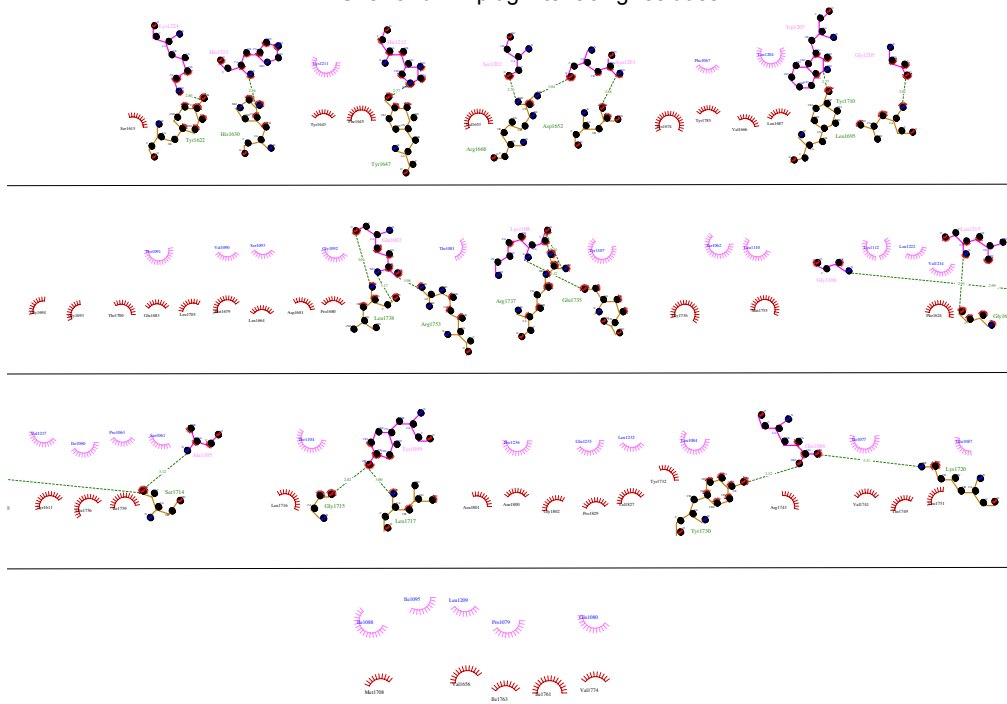

### Supplementary Figure 4 | **The FN-plugin and YD-shell interface.**

Interacting residues of Ten2 FN-plugin (pink) and YD-shell domains (orange) were analysed and plotted using LigPlot(+) <sup>1</sup>. Hydrogen bonds are indicated for residues shown as sticks. Residues providing hydrophobic contacts are shown as arches. The linear representation of the interface is continued in sequential fashion, i.e. line-by-line and left to right.

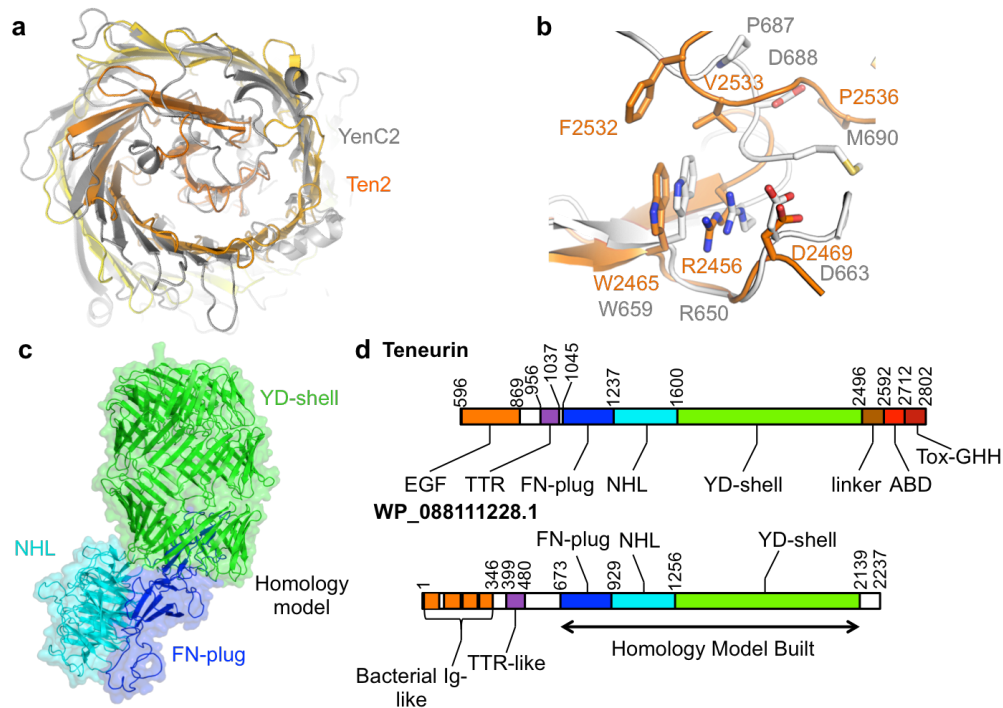

Supplementary Figure 5 | **Bacterial and Teneurin YD proteins.** **a.** Top view of the bacterial toxin YenC2 (grey) and the Ten2 (yellow to orange as in Fig. 1b) YD-shells aligned via their Rhs-associated core regions. **b.** Zoomed view of the auto-proteolytic site in the YenC2 Rhs-associated core region (white). Structural alignment of the Ten2 (orange) Rhs-associated core region shows conservation of some catalytically important residues (D663 and R650 in YenC2, corresponding to D2469 and R2456 in Ten2), but a substantial shift in the backbone for a region containing a third essential catalytic residue (D688 in YenC2). Side chains are shown as sticks. **c.** A high confidence homology model, based on the crystal structure of Ten2<sup>CT</sup>, was produced by SWISS-MODEL (GMQE 0.44, QMEAN -2.12) from the *B. subtilis* protein WP\_088111228.1. The results show it contains a Teneurin-like FN-plugin, NHL and YD-shell. **d.** Schematics comparing the domain organization of Teneurin (upper panel) and *B. subtilis* protein WP088111228.1 (lower panel).

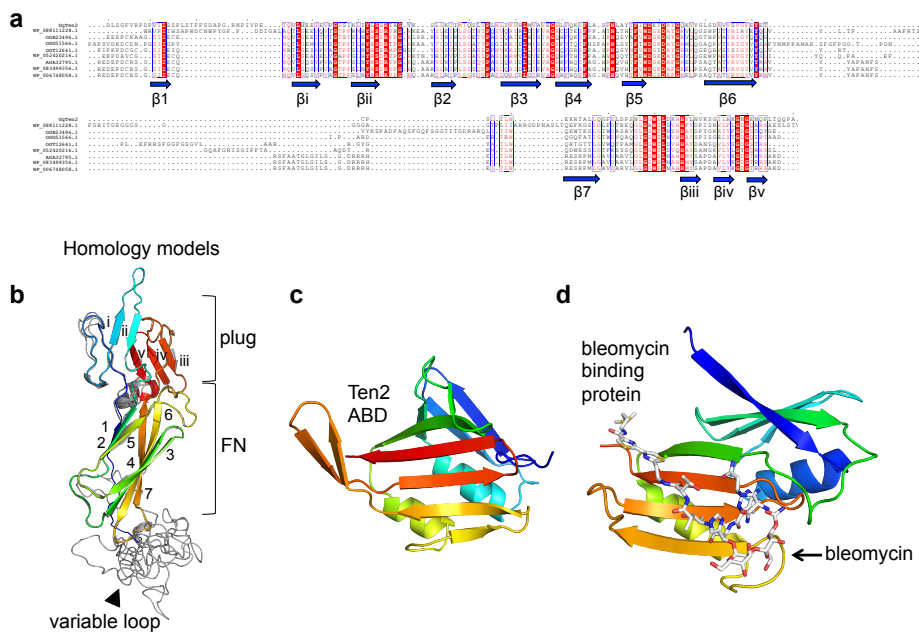

Supplementary Figure 6 | **Unpredicted prokaryotic-type domains found in the Teneurin super-fold.** **a.** Structure-based sequence alignment of the chicken Ten2 FN-plug domain with FN-plug domains from both gram positive and gram negative bacterial species. The secondary structure of the Ten2 FN-plug is shown below the alignment where each arrow represents a  $\beta$ -strand.  $\beta$ -strands are numbered as in Fig. 2b. **b.** Overlay of the Ten2 FN-plug domain (coloured according to the rainbow) and high confidence homology models of the bacterial FN-plug domains shown in **a** are coloured in grey.  $\beta$ -strands are numbered as in Fig. 2b. A variable loop between  $\beta$ -strands 6 and 7 is indicated. **c,d.** The Ten2 ABD and bleomycin binding protein (PDB 1EWJ)<sup>2</sup> are shown in ribbon representation and coloured according to the rainbow (blue, N-terminus; red, C-terminus). Bleomycin is shown as sticks. The equivalent bleomycin-binding site in the Ten2 ABD is solvent exposed in the Ten2<sup>CT</sup> crystal structure.

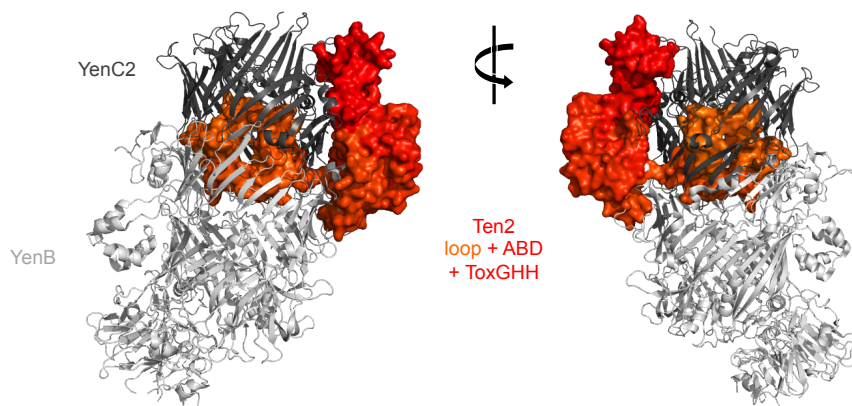

Supplementary Figure 7 | **Superposition of Ten2<sup>CT</sup> and a bacterial TcB-TcC toxin.**

The bacterial YenB/C2 complex was structurally aligned with Ten2<sup>CT</sup> via the C2 subunit, and is displayed as ribbons. B is in light grey, C2 is in dark grey. The Ten2 internal loop, ABD and Tox-GHH domains are depicted as surfaces, coloured as in Fig. 1b, highlighting where these domains and the internal loop exit site lie with respect to the bacterial proteins.



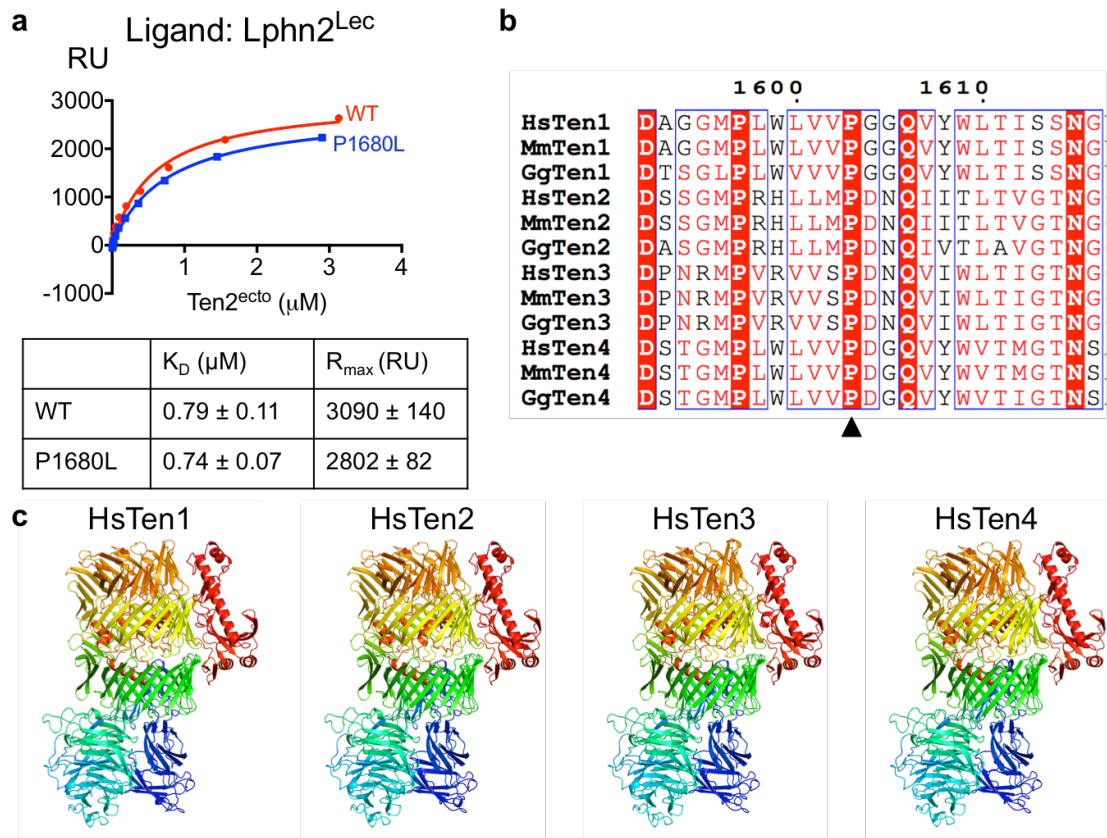

Supplementary Figure 8 | **Biophysical characterization of the Ten2 anosmia-linked P1680L mutation.** **a.** Lphn2<sup>Lec</sup> was immobilized on the surface of a streptavidin-coated CM5 chip and different concentrations of Ten2<sup>ecto</sup> (wild type and mutant, P1680L) injected as analytes. The data were fitted using a 1:1 binding model. The standard error of the K<sub>D</sub> and R<sub>max</sub> values is shown, demonstrating that the binding of Lphn2<sup>Lec</sup> to Ten2<sup>ecto</sup> is unaffected by the anosmia-linked mutation, P1680L. **b.** Sequence alignment showing 100% conservation of the proline residue mutated in congenital anosmia (marked with an arrowhead) across all Teneurin paralogues in human, mouse and chicken. **c.** High confidence homology models of all four human Teneurin paralogues based on the crystal structure of Ten2<sup>CT</sup> demonstrating the high level of structural conservation across the family.

## **Supplementary Table 1**

| <b>Cloning Primers</b>     |           |                                         |                                                               |
|----------------------------|-----------|-----------------------------------------|---------------------------------------------------------------|
| Construct                  | Direction | Residue #                               | Sequence                                                      |
| Ten2 <sup>CT</sup>         | Forward   | 955                                     | GTAGCTGAAACCGGTAGCCTTGTGTCTCTTATAAGAGGCCAAGTG                 |
| Ten2 <sup>CT</sup>         | Reverse   | 2802                                    | GTGGTGCTTGGTACCCCTCTTTCCATTTCATTCTGTCTTAAAACTGG               |
| Ten3 <sup>CT</sup>         | Forward   | 846                                     | AATAATGGATCCTTCTATGACCGAATCAGTTTC                             |
| Ten3 <sup>CT</sup>         | Reverse   | 2715                                    | AATAATGCGGCCGCCCTCTTGCCGATCTCACTTTG                           |
| Ten2 <sup>ecto</sup>       | Forward   | 596                                     | GTAGCTGAAACCGGTGTTATTTGGATTCAAGTCAAGACTGTCCACG                |
| Ten2 <sup>ecto</sup>       | Reverse   | 280                                     | GGAACCTCCGGTACCCCTCTTTCCATTTCATTCTGTCTTAAAACTGG               |
| Lphn2 <sup>Lec</sup>       | Forward   | 30                                      | GTAGCTGAAACCGGTGCCTTACCATTCCGGTTAGTTAGACGA                    |
| Lphn2 <sup>Lec</sup>       | Reverse   | 137                                     | GGAACCTCCGGTACCCACCAGCATCTTGCTGTAAGGGACACATTCATATTGAACTTCAAGG |
| <b>Mutagenesis Primers</b> |           |                                         |                                                               |
| Construct                  | Direction | Sequence                                |                                                               |
| Ten2 <sup>P1680L</sup>     | Forward   | GATAATCAGATTGTCACGCTGGCCGTT             |                                                               |
| Ten2 <sup>P1680L</sup>     | Reverse   | GACAATCTGATTATCAAGCATCAGTAAATGGCGGGGCAT |                                                               |

Supplementary Table 1 | **Cloning and mutagenesis primers for Teneurin and Latrophilin constructs.**

## **Supplementary References**

1. Laskowski, R. A. & Swindells, M. B. LigPlot+: Multiple ligand-protein interaction diagrams for drug discovery. *J. Chem. Inf. Model.* **51**, 2778–2786 (2011).
2. Maruyama, M. *et al.* Crystal structures of the transposon Tn5-carried bleomycin resistance determinant uncomplexed and complexed with bleomycin. *J. Biol. Chem.* **276**, 9992–9999 (2001).
